# Supplementary material for: Homogenisation of the Local Thermal Conductivity in Injection-Moulded Short Fibre Reinforced Composites
Source: MDPI journal article supplement (doi:10.3390/polym14163360), 2022-08-17
Supplement: s1 [file s1]

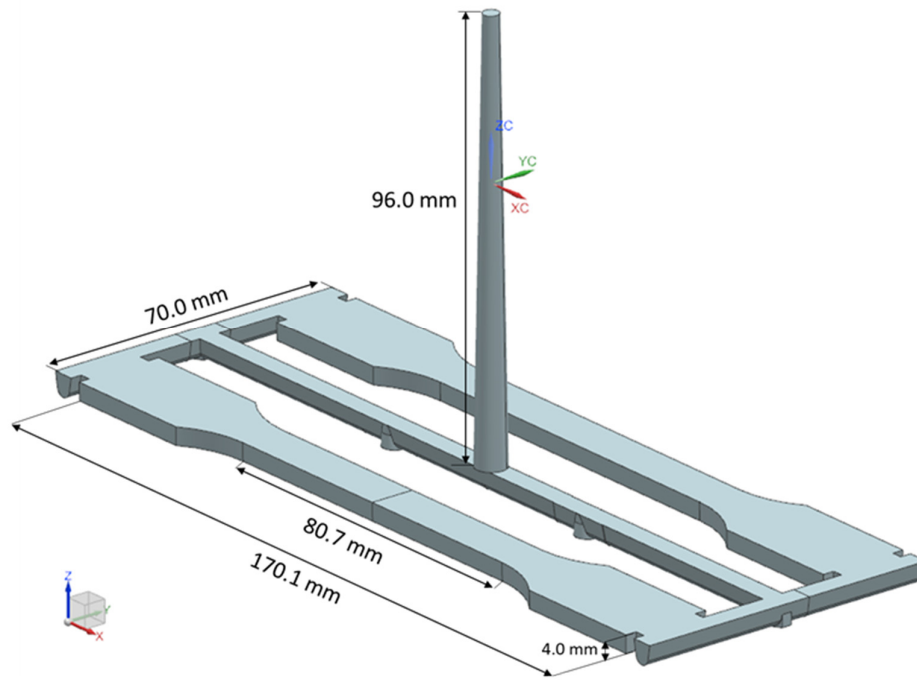

**Figure S1.** The geometry of the injection moulded part with the sprue and runners.

**Table S1.** Injection moulding processing parameters.

| Process Parameters | Values                  |
|--------------------|-------------------------|
| Melt Temperature   | 270 °C                  |
| Packing pressure   | 35 MPa                  |
| Packing time       | 10 sec                  |
| Injection speed    | 20 cm <sup>3</sup> /sec |
| Cooling time       | 30 sec                  |
| Mould temperature  | 80 °C                   |
